# Supplementary material for: Sample preconcentration through airjet-induced liquid phase enrichment
Source: Royal Society of Chemistry journal article supplement (doi:10.1039/d3lc00481c), 2023-01-01
Supplement: d3lc00481c1.pdf [file d3lc00481c1.pdf]

## Supporting Information

### **Sample Preconcentration through Airjet-Induced Liquid Phase Enrichment**

*Edward Wang<sup>a</sup>, Louise C. Laurent<sup>b</sup>, Drew A. Hall<sup>c</sup> and Yu-Hwa Lo<sup>ac</sup>*

- a) Department of Aerospace and Mechanical Engineering, Materials Science and Engineering Program, University of California, San Diego, La Jolla, CA, USA*
- b) Department of Obstetrics, Gynecology, and Reproductive Sciences, University of California, San Diego, La Jolla, CA, USA*
- c) Department of Electrical and Computer Engineering, University of California, San Diego, La Jolla, CA, USA*

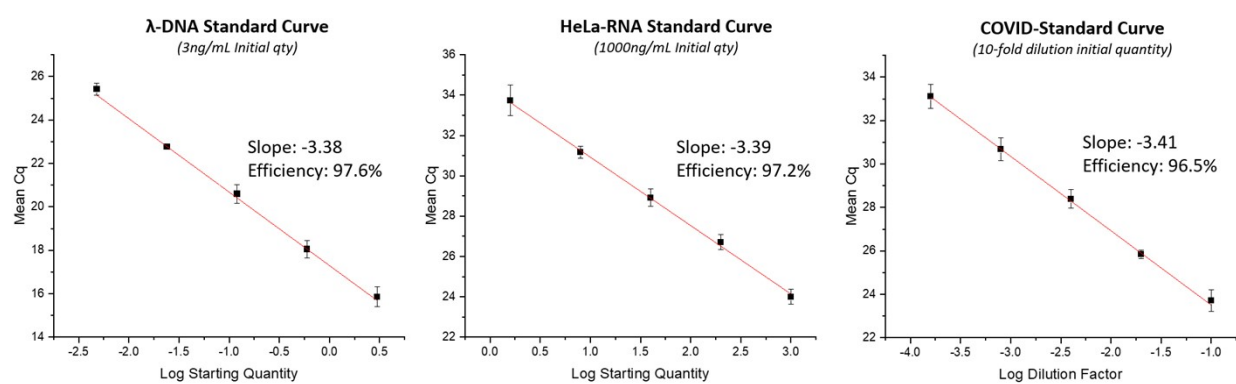

**Figure S1.** Amplification efficiencies of nucleic acids used in enrichment

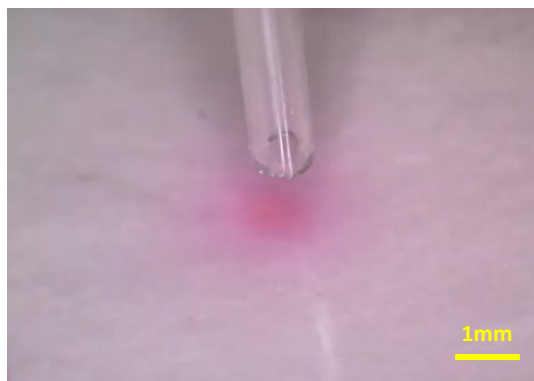

**Figure S2.** Enrichment of rhodamine in ethanol after 2 minutes. 20  $\mu\text{L}$  of rhodamine solution was deposited on a hydrophilic glass surface, and 1  $\mu\text{L}$  of a 1% PDMS solution in hexane was added to the surface of the solution.

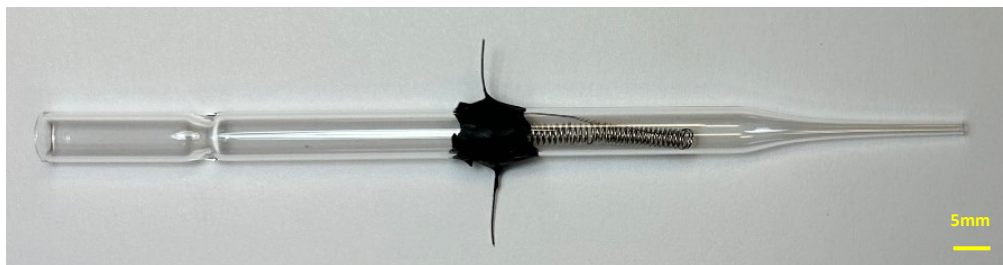

**Figure S3.** Image of the heated airjet nozzle used for enrichment. The nozzle consists of two halves of a borosilicate glass pipette with the heating element interested in the middle. The heating element consists of a 40 mm coil nichrome that is braided at the ends with wire. The glass halves are then sealed with ceramic adhesive.

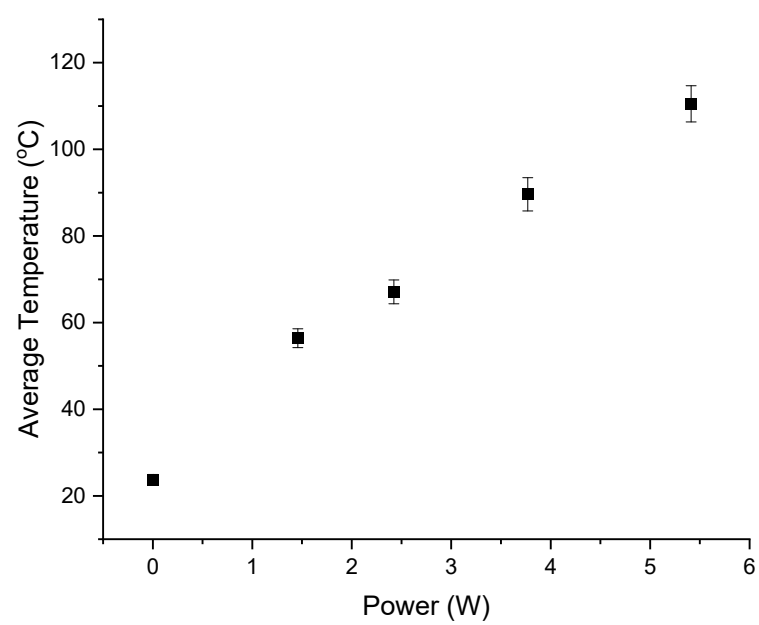

**Figure S4.** Average temperature vs. power for the pipette's exit nozzle

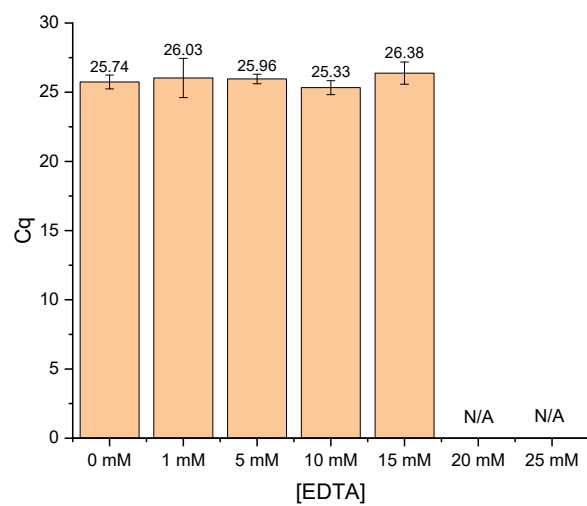

**Figure S5.**  $C_q$  vs. EDTA concentration for a solution of  $\lambda$ -DNA. For each concentration, 1  $\mu$ L from the EDTA solution was added to 9  $\mu$ L of the qPCR reaction mix.

**a.**

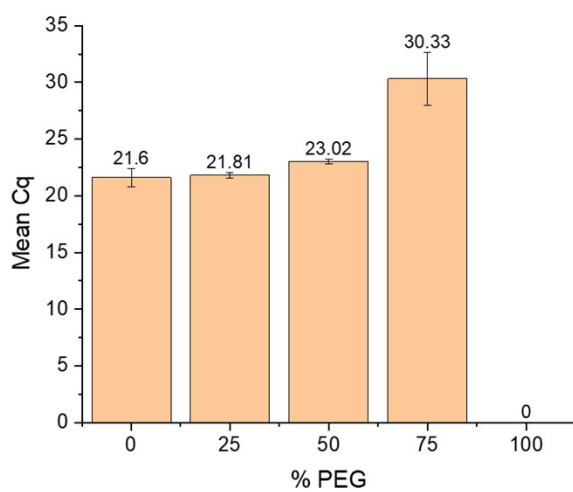

**b.**

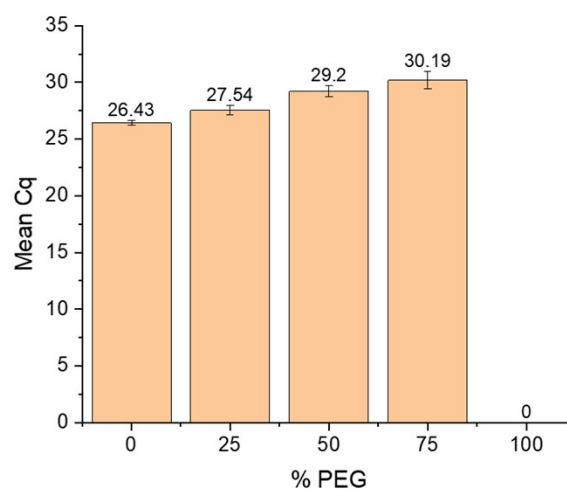

**Figure S6.** Effects of PEG concentration for **(a)** qPCR using  $\lambda$ -DNA and **(b)** RT-qPCR for HeLa-S3 RNA. Concentrations of nucleic acid were kept constant in varying concentrations of PEG.
